# Supplementary material for: Spatial, temporal and genetic dynamics of highly pathogenic avian influenza A (H5N1) virus in China
Source: Springer Nature journal article supplement (doi:10.1186/s12879-015-0770-x), 2015-02-12
Supplement: MOESM1 [file 9739546]

**Table S3.** Evolutionary profiles of H5N1 HPAI viruses: comparisons between strict and relaxed (uncorrelated lognormal) molecular clocks using the Constant, Exponential growth, Bayesian skyride and Bayesian skyline coalescent prior.

|           | Best fit clock model | Evolutionary rates (sub/site/year) $\times 10^{-3}$ (95% HPD*) |                    |                  |                  |                                               |                    |                  |                  |
|-----------|----------------------|----------------------------------------------------------------|--------------------|------------------|------------------|-----------------------------------------------|--------------------|------------------|------------------|
|           |                      | Strict clock                                                   |                    |                  |                  | Uncorrelated lognormal molecular clock (ULCN) |                    |                  |                  |
|           |                      | Constant size                                                  | Exponential growth | Bayesian Skyride | Bayesian Skyline | Constant size                                 | Exponential growth | Bayesian Skyride | Bayesian Skyline |
| 2000-2001 | Strict-Skyride       | 4.15(2.97-5.44)                                                | 3.49(2.34-4.76)    | 3.85(2.98-4.80)  | 4.12(3.07-5.39)  | 4.36(2.96-5.98)                               | 4.36(2.93-5.82)    | 4.61(3.25-6.08)  | 4.65(2.93-6.37)  |
| 2001-2002 | Strict-Constant      | 4.06(3.03-5.17)                                                | 3.24(2.11-4.48)    | 3.83(2.92-4.78)  | 3.72(2.73-4.72)  | 5.17(3.63-6.74)                               | 4.86(3.21-6.59)    | 5.16(3.58-6.63)  | 5.48(3.80-7.18)  |
| 2002-2003 | Strict-Exponential   | 2.51(1.87-3.26)                                                | 2.34(1.68-3.09)    | 2.29(1.68-2.93)  | 2.47(1.81-3.13)  | 2.52(1.78-3.29)                               | 2.97(2.01-3.94)    | 2.79(1.85-3.87)  | 2.61(1.77-3.49)  |
| 2003-2004 | Strict-Constant      | 4.31(3.38-5.23)                                                | 4.15(3.31-5.00)    | 4.19(3.28-5.12)  | 4.21(3.24-5.13)  | 4.83(3.76-5.93)                               | 4.84(3.7-6.22)     | 1.04(0.01-5.02)  | 4.86(3.38-6.60)  |
| 2004-2005 | Strict-Skyride       | 6.81(5.69-7.95)                                                | 6.88(5.66-8.03)    | 6.63(5.73-7.56)  | 6.70(5.69-7.67)  | 8.99(6.69-11.08)                              | 7.83(6.31-10)      | 7.15(5.55-8.46)  | 7.37(4.20-9.98)  |
| 2005-2006 | Strict-Exponential   | 3.55(2.94-4.17)                                                | 3.62(3.09-4.19)    | 3.85(2.5-5.14)   | 3.14(2.03-3.92)  | 3.52(2.73-4.44)                               | 4.31(3.27-5.38)    | 4.03(1.25-5.69)  | 3.44(1.29-4.53)  |
| 2006-2007 | UCLN-Exponential     | 4.18(3.28-5.17)                                                | 3.76(2.59-4.68)    | 4.07(2.8-5.45)   | 3.41(2.28-4.47)  | 5.72(3.78-7.44)                               | 5.48(3.99-6.92)    | 4.83(1.25-5.69)  | 5.61(2.20-8.40)  |
| 2007-2008 | Strict-Skyline       | 4.37(3.29-5.56)                                                | 4.19(3.06-5.37)    | 4.52(3.4-5.62)   | 4.66(3.63-5.81)  | 4.08(2.76-5.55)                               | 4.58(3.04-6.27)    | 4.96(3.63-6.44)  | 5.01(3.22-7.13)  |
| 2008-2009 | Strict-Exponential   | 4.91(3.64-6.12)                                                | 4.84(3.58-6.07)    | 5.03(3.85-6.26)  | 4.74(3.57-6.02)  | 5.98(4.04-8.06)                               | 6.33(3.94-8.79)    | 7.31(4.72-10.08) | 6.44(4.12-8.96)  |
| 1996-2004 | UCLN-Exponential     | 3.24(2.92-3.60)                                                | 3.19(2.86-3.51)    | 4.03(3.58-4.52)  | 3.63(3.13-4.10)  | 3.54(3.08-3.97)                               | 3.77(3.33-4.22)    | 4.03(3.57-4.51)  | 3.63(3.13-4.10)  |
| 2005-2011 | Strict-Constant      | 4.39(4.03-4.76)                                                | 4.44(4.06-4.80)    | 4.35(3.88-4.81)  | 4.45(4.05-4.87)  | 4.28(3.67-4.84)                               | 4.26(3.15-5.11)    | 4.30(3.82-4.78)  | 3.95(3.58-4.28)  |

\*HPD, highest posterior density.
