# Supplementary material for: Spatial, temporal and genetic dynamics of highly pathogenic avian influenza A (H5N1) virus in China
Source: Springer Nature journal article supplement (doi:10.1186/s12879-015-0770-x), 2015-02-12

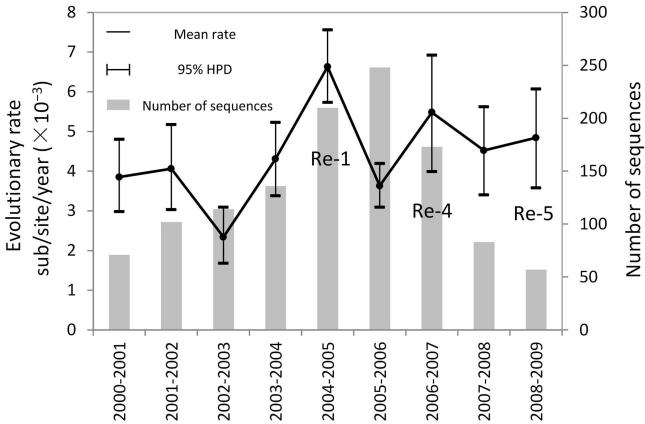

Supplement: MOESM5 [file 9739546]
